# Supplementary material for: Salmonella Typhimurium biofilm disruption by a human antibody that binds a pan-amyloid epitope on curli
Source: PubMed Central journal article supplement (PMC7035420; doi:10.1038/s41467-020-14685-3), 2020-02-21
Supplement: 41467_2020_14685_MOESM1_ESM.pdf [file 41467_2020_14685_MOESM1_ESM.pdf]

**SUPPLEMENTARY INFORMATION**  
**Tukel et al.**

| <b>Antibody</b> | <b>Oligomers<br/>nM</b> | <b>Fibrils<br/>nM</b> | <b>CTB oligo<br/>nM</b> | <b>CTB mono<br/>nM</b> | <b>NTB mono<br/>nM</b> |
|-----------------|-------------------------|-----------------------|-------------------------|------------------------|------------------------|
| 3H3             | 40                      | 2.1                   | 35                      | 3.4                    | 240                    |
| 4G1             | 8.8                     | 14                    | 11.4                    | 16                     | 1700                   |
| 4A6             | 1300                    | 11                    | >2000                   | 16                     | >2000                  |
| 2C10            | >2000                   | 16                    | >2000                   | >2000                  | >2000                  |
| 6E10            | 69                      | 56                    | 50                      | 47                     | 158                    |

**Supplementary Table 1. MAb binding to A $\beta$ 42 conformers measured by Surface Plasma Resonance (SPR).** Calculated affinity constants ( $K_D$ ) were obtained using Qdat software. Oligomers, ADDLs/globulomers; CTB oligo, C-terminal biotinylated ADDLs/globulomers; CTB mono, C-terminal biotinylated monomers; NTB mono, N-terminal biotinylated monomers. 6E10, mouse mAb to A $\beta$  amino acids 1-16 (BioLegend, San Diego, CA). Compared to the the N-terminal biotinylated monomer, all of the mAbs exhibit lower affinity binding to some or all of the A $\beta$ 42 oligomers or fibrils. The 3H3 binding data is qualitatively most similar to the 4G1 and 6E10 mAbs. 4A6 and 2C10 preferentially bind A $\beta$  fibrils.

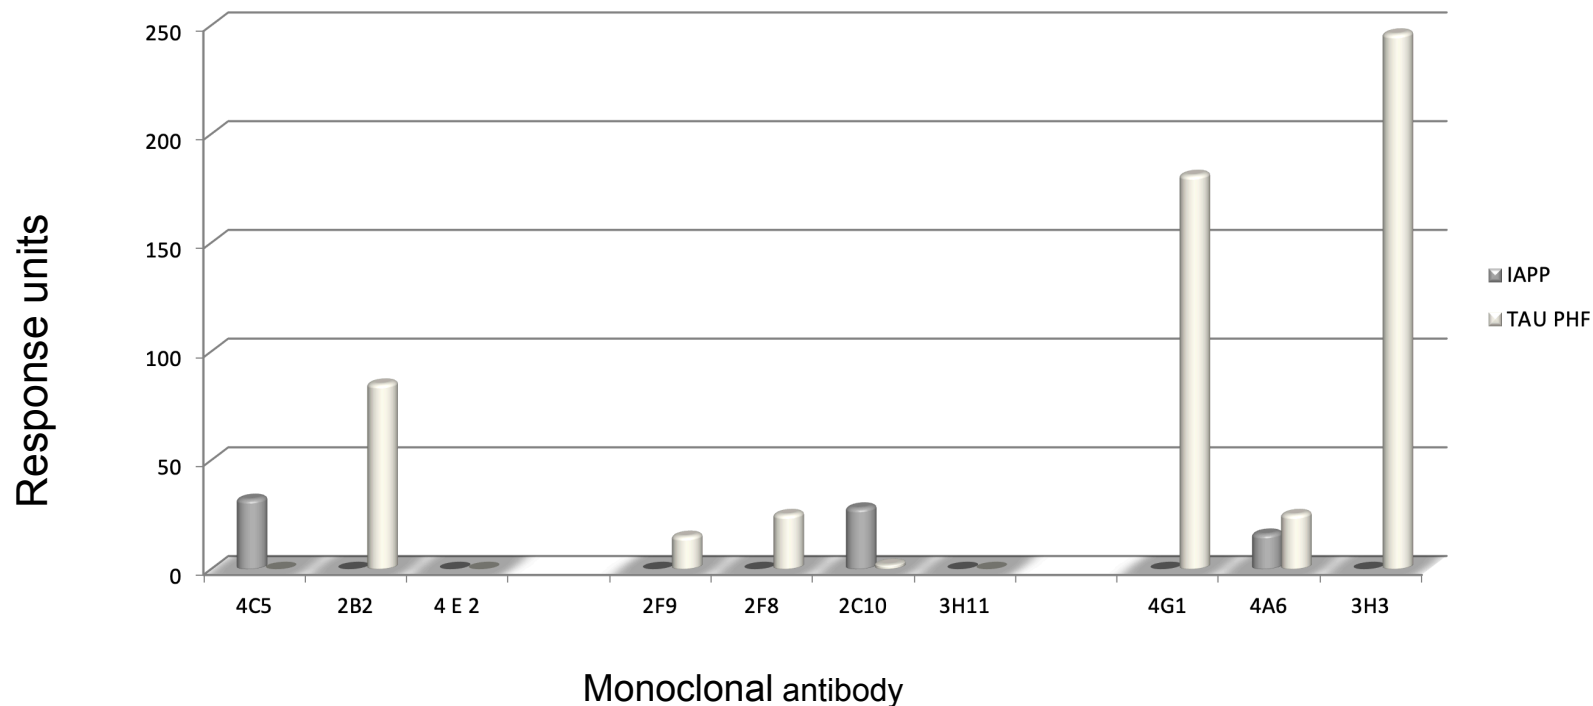

**Supplementary Figure 1.** Human mAbs were assayed by SPR for binding to aggregated islet amyloid peptide IAPP and tau paired helical filaments (PHF) isolated from AD brain homogenates. The antibody concentrations used in this study were 110 nM for the IAPP and 66.7 nM for the tau-PHF. The 3H3 and 4G1 mAbs are notable for binding to Tau PHF, consistent with recognition of a pan-amyloid epitope. The additional mAbs tested are human IgGs isolated from the same patient as 4G1.

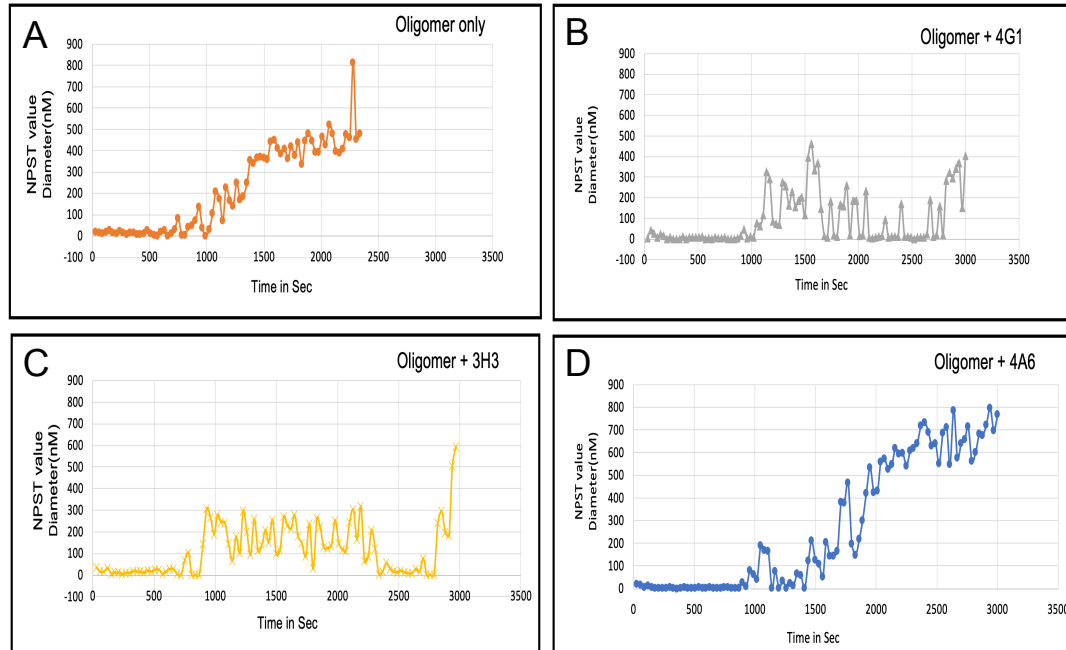

**Supplementary Figure 2.** Fibrillization of **A $\beta$ 42** of amyloid beta oligomers alone (**A**) or in presence of anti-amyloid mAbs, 3H3 (**B**), 4G1 (**C**) and 4A6 (**D**).

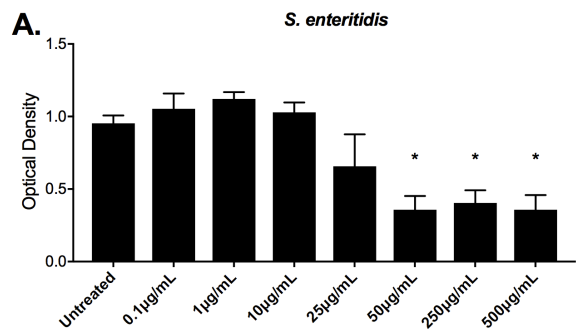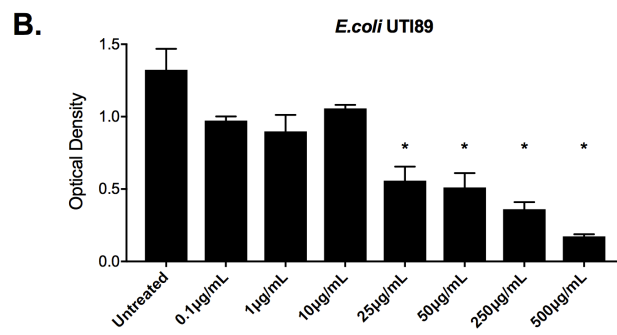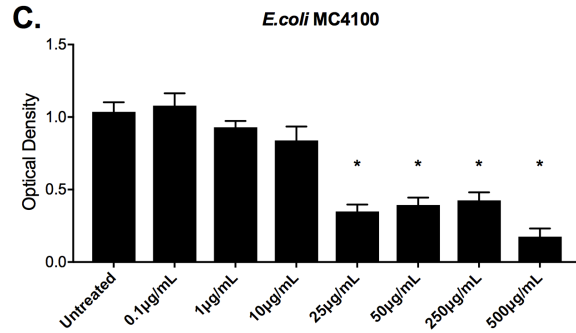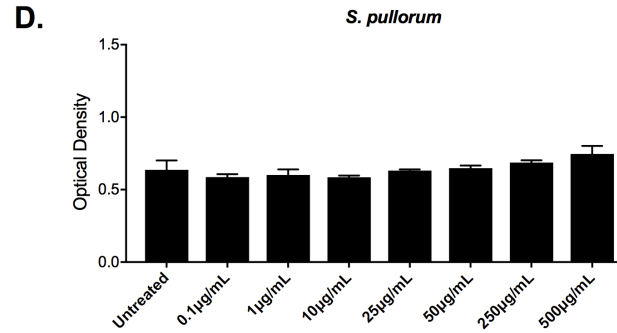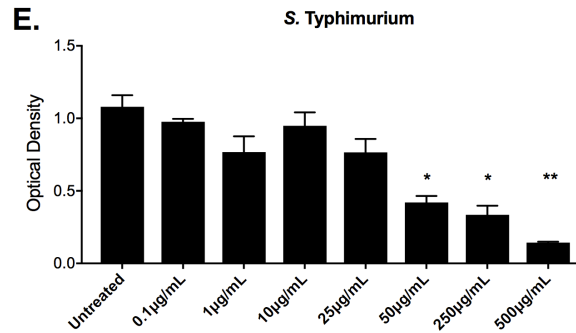

**Supplementary Figure 3. 3H3 disrupts biofilm formation in clinical isolates of *Salmonella* and *E. coli*.**

Biofilms of **A.** *S. enteritidis*, **B.** *E. coli* UT189 **C.** *E. coli* MC4100, **D.** *S. pullorum*, and **E.** *S. Typhimurium* were grown in the absence (untreated) or presence of 3H3 antibody (0.1µg/mL, 1µg/mL, 10µg/mL, 25µg/mL, 50µg/mL, 250µg/mL and 500µg/mL). After 72 hours, biofilms were stained with crystal violet, and the optical density at 570 nm was determined. Mean and SE were calculated from results from at least two independent experiments. \* p < 0.05, \*\* p < 0.01 as determined by ANOVA with Tukey post hoc analysis.

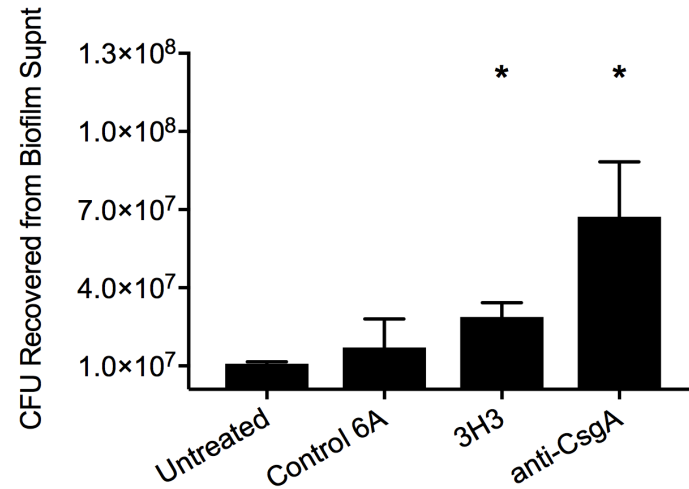

**Supplementary Figure 4. 3H3 enhances the number of bacterial cells recovered from biofilm supernatants.** *S. Typhimurium* biofilms were incubated in the absence of mAb (untreated) or in the presence of 0.5 mg/ml control A6, 0.5 mg/ml 3H3, or anti-CsgA serum. After 72 hours, 100  $\mu$ l biofilm supernatant was collected, and the bacteria were enumerated as colony forming units. Mean and SE were calculated from results from at least three independent experiments. \*  $p < 0.05$ , \*\*  $p < 0.01$  as determined by Student's t-test.

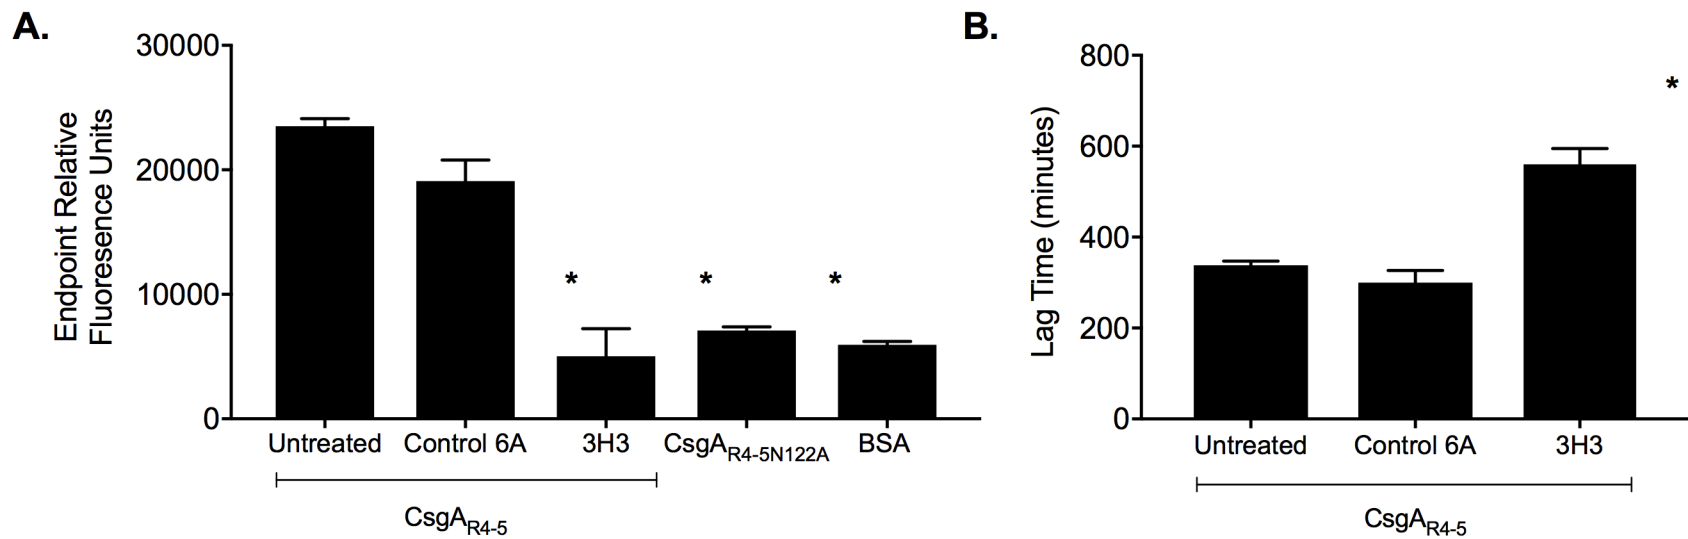

**Supplementary Figure 5. 3H3 inhibits CsgA fibrillization** **A.** Samples of 100  $\mu$ M CsgA<sub>R4-5</sub>, 100  $\mu$ M CsgA<sub>R5-4N122A</sub>, or 500  $\mu$ g/ml BSA were mixed with 10  $\mu$ M ThioflavinT (ThT) in the presence of either 0.5 mg/ml 3H3 or 0.5 mg/ml control A6, and fluorescence of ThT (excitation 440 nm/emission 490 nm) was monitored. Endpoint RFU is plotted. **B.** Lag times of fibrillization of CsgA<sub>R4-5</sub> in the presence of control 6A or 3H3. Mean and SE were calculated from results from at least three independent experiments. \*  $p < 0.05$ , \*\*  $p < 0.01$  as determined by Student's t-test.

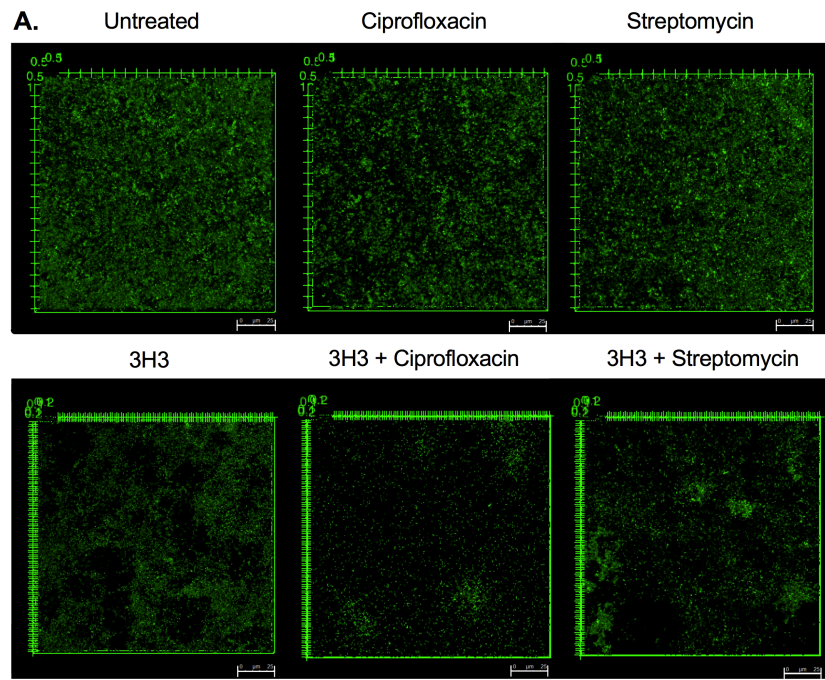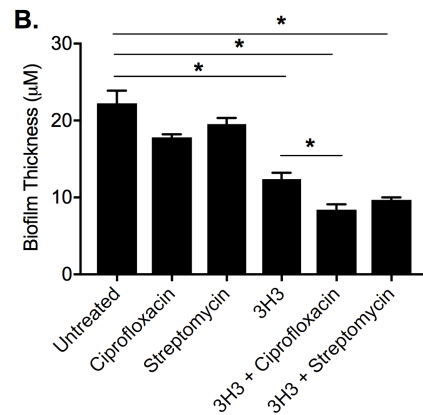

**Supplementary Figure 6. Synergistic effect of 3H3 and antibiotic treatment.** **A.** *S. Typhimurium* biofilms were untreated or were incubated in the presence of 0.5 mg/ml 3H3 for 72 hours. After 72 hours, biofilms were subjected to treatment with 0.125 μg/ml ciprofloxacin or 12.5 μg/ml streptomycin for an additional 24 hours. Biofilms were stained with Syto9 (green), washed extensively, and visualized using Leica TCS confocal microscopy at 63x. Scale bars represent 25 μm. ImageJ was used to create 3D reconstructions of z-stacks. **B.** Biofilm thickness (μm) was determined from z-stacks using Leica TCS software. Mean and SE were calculated from results from at least two independent experiments. \*  $p < 0.05$
